# Supplementary material for: Female sexual behavior in mice is controlled by kisspeptin neurons
Source: PubMed Central journal article supplement (PMC5786055; doi:10.1038/s41467-017-02797-2), 2018-01-26
Supplement: 41467_2017_2797_MOESM1_ESM.pdf [file 41467_2017_2797_MOESM1_ESM.pdf]

## **Supplemental Information**

### **Female sexual behavior in mice is controlled by kisspeptin neurons**

Hellier et al.

## Supplementary Figures

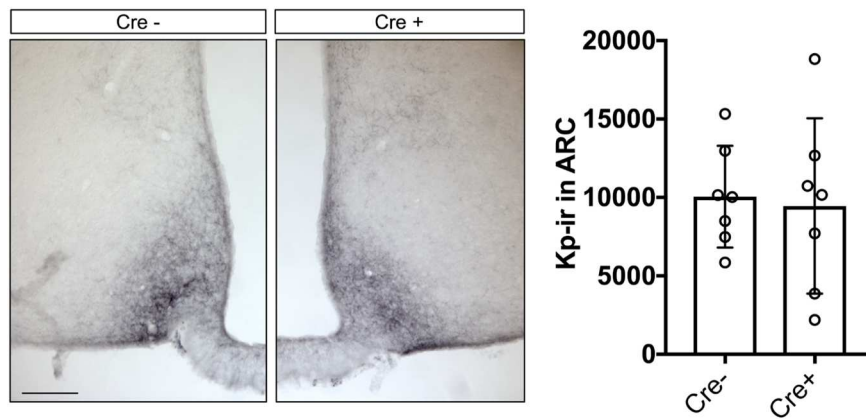

Supplementary Fig. 1: Kisspeptin expression in the arcuate nucleus is unaffected by viral ablation of the RP3V kisspeptin population. (a) Photomicrographs showing examples of kisspeptin-immunoreactivity in a *Kiss1C* (*Cre*<sup>-</sup>, left) and *Kiss1C* (*Cre*<sup>+</sup>, right) mouse; (b) Total amount of kisspeptin (Kp)-immunoreactivity indicated as total area ( $\mu\text{m}^2$ ) covered by thresholded pixels. Unpaired two-tailed t test;  $P=0.81$ ;  $n=7$  per genotype; Scale bar represents 100  $\mu\text{m}$ . Bars represent means  $\pm$  SEM. For all experimental details, see supplementary Table 1.

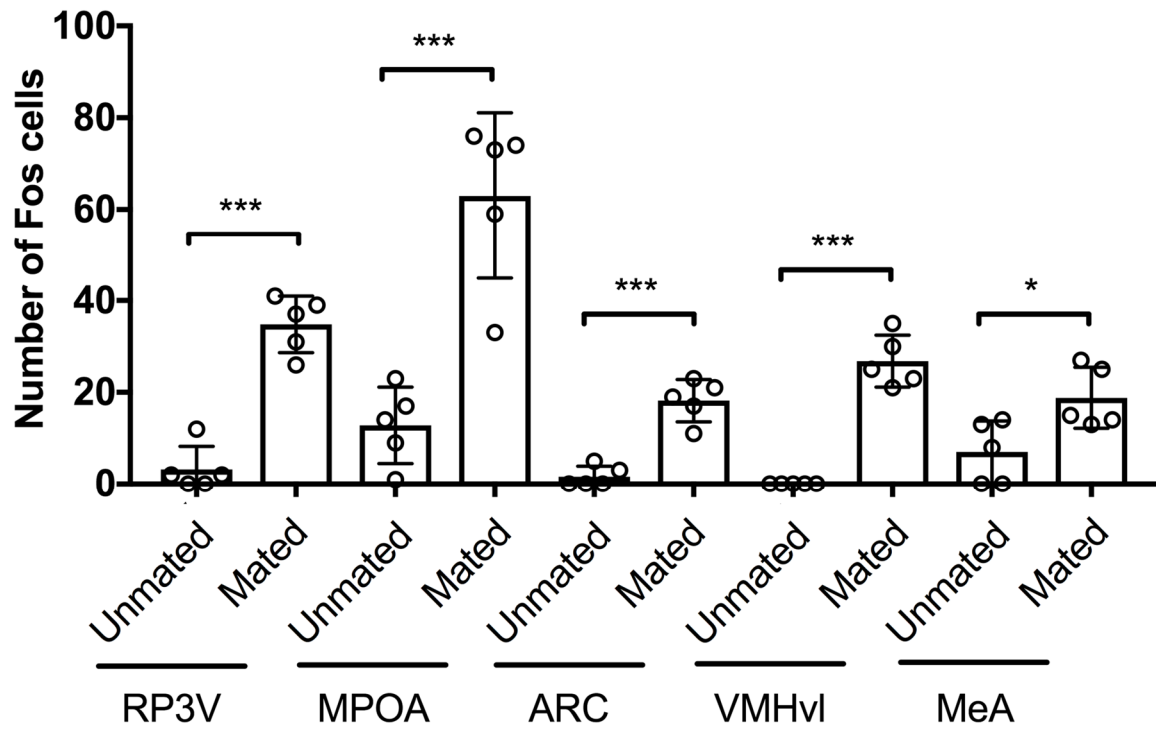

Supplementary Fig. 2: Fos activation upon mating in hypothalamic regions implicated in sexual behavior. Ovary intact, female mice were either mated with a sexually active male for 15 min or left alone in their homecage. Brains were processed for Fos immunoreactivity. Abbreviations are as follows: RP3V rostral periventricular area of the third ventricle of the hypothalamus; MPOA, medial preoptic area; ARC, arcuate nucleus; VMHvl, ventrolateral part of the ventromedial hypothalamus; MeA, medial amygdala. Bars represent means  $\pm$  SEM. Tukey's multiple comparison test; \* $P \leq 0.05$ , \*\*\* $P \leq 0.001$  compared to unmated;  $n=5$ . For all experimental details, see supplementary Table 1.

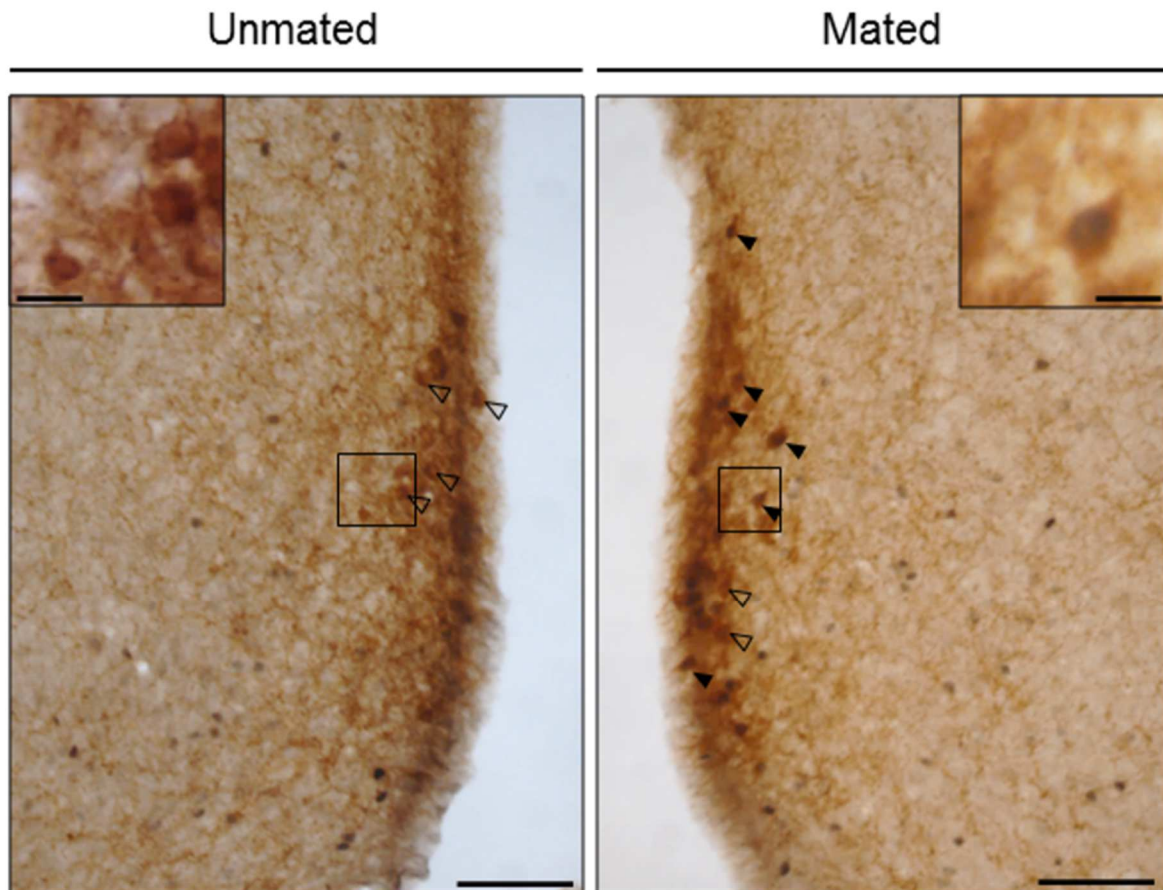

Supplementary Fig. 3: Fos/kisspeptin double-labeling upon mating in the RP3V. Representative photomicrographs from an unmated female (left panel) and mated female (right panel). Inserts show higher magnification. Black arrow heads show double-labeled Fos (in blue)/kisspeptin (in brown) neurons. White arrow heads show single-labeled kisspeptin neurons detected in brown. Scale bar represents 100  $\mu\text{m}$  and 10  $\mu\text{m}$ , respectively. For all experimental details, see supplementary Table 1.

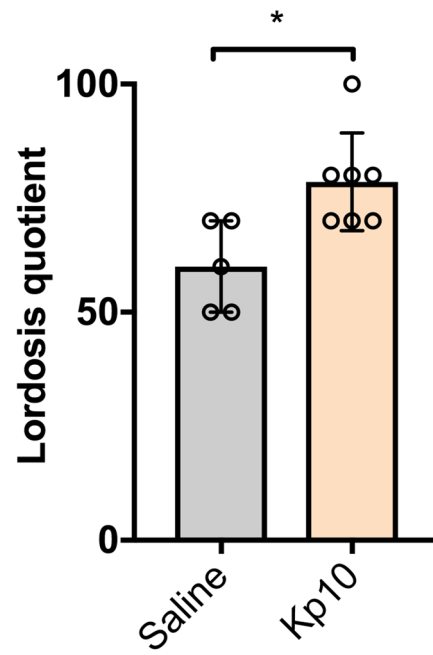

Supplementary Fig. 4: An intracerebroventricular injection with kisspeptin (Kp-10; 10.4 ng/kg) stimulates lordosis behavior in *WT* female mice. Bars represent means  $\pm$  SEM and the number of animals for each experimental group is given in each bar. Unpaired t test;  $*P \leq 0.05$ ;  $n=5$  (saline) and 7 (Kp10). For all experimental details, see supplementary Table 1.

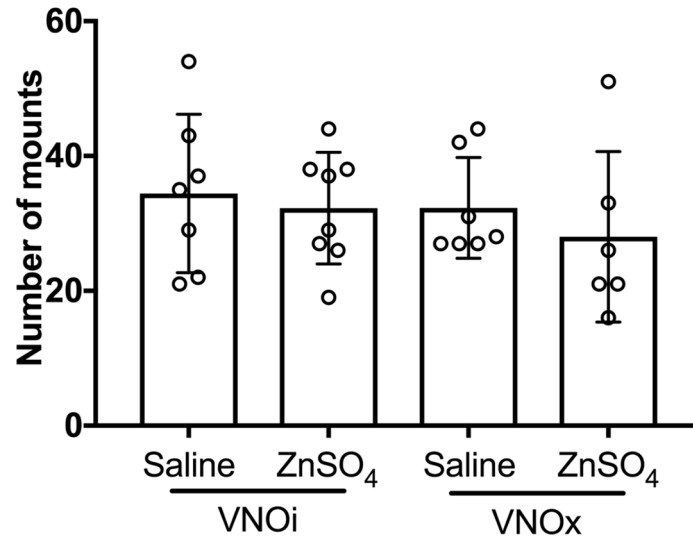

Supplementary Fig. 5: VNO removal (VNOx) or ablation of the MOE by intranasal infusion with a zinc sulfate (ZnSO<sub>4</sub>) solution did not affect the number of mounts received from the stimulus male. Bars represent means ± SEM. Dunn's multiple comparison test;  $P > 0.99$  for each group compared to Saline/VNOi group;  $n = 7/8/7/6$ . For all experimental details, see supplementary Table 1.

Supplementary Table 1. Genetic background of the mouse models used and hormonal treatments before the behavioral tests.

|               | Mouse model                                              |                                     | Surgeries  | Treatments                   |                        |                 |                            |            |                              | N                          |
|---------------|----------------------------------------------------------|-------------------------------------|------------|------------------------------|------------------------|-----------------|----------------------------|------------|------------------------------|----------------------------|
|               | Genotype                                                 | Genetic Background                  |            | Viruses*                     | E <sub>2</sub><br>(sc) | Prog<br>(sc) ** | Treatment                  | Injection  | Stimulation                  |                            |
| <b>Fig. 1</b> |                                                          |                                     |            |                              |                        |                 |                            |            |                              |                            |
| a             | <i>WT</i>                                                | <i>C57Bl/6J</i>                     | OVX / VNOx | -                            | x                      | x               | Saline / ZnSO <sub>4</sub> | intranasal | Clean or Male-soiled bedding | 28/9/7/8/9                 |
| b             | <i>Kiss<sup>+/+</sup> &amp; Kiss<sup>-/-</sup></i>       | <i>129/SvJ</i>                      | OVX        | -                            | x                      | x               | Kp-10                      | sc         | Male and female odors        | 9 per genotype             |
| c-d           | <i>KissCre<sup>-/-</sup> &amp; KissCre<sup>+/+</sup></i> | <i>Mixed C57Bl/6J &amp; 129/SvJ</i> | OVX        | <i>AAV-flex-taCasp3-TEVp</i> | x                      | x               | -                          | -          | Mating                       | 7 per genotype             |
| e             | <i>KissCre<sup>-/-</sup> &amp; KissCre<sup>+/+</sup></i> | <i>Mixed C57Bl/6J &amp; 129/SvJ</i> | OVX        | <i>AAV-flex-taCasp3-TEVp</i> | x                      | x               | - / Kp10                   | sc         | Male and female odors        | 7 per genotype             |
| <b>Fig. 2</b> |                                                          |                                     |            |                              |                        |                 |                            |            |                              |                            |
| a             | <i>WT</i>                                                | <i>C57Bl/6J</i>                     | -          | -                            | -                      | -               | -                          | -          | Mating                       | 3 (Unmated) / 5 (Mated)    |
| b             | <i>WT</i>                                                | <i>C57Bl/6J</i>                     | OVX        | -                            | x                      | -               | Saline/ Kp10               | sc         | Mating                       | 8 per group                |
| c-d           | <i>Kiss<sup>+/+</sup> &amp; Kiss<sup>-/-</sup></i>       | <i>129/SvJ</i>                      | OVX        | -                            | x                      | x               | - / Kp10                   | sc         | Mating                       | 7 (Kiss <sup>+/+</sup> ) / |

|     |                                                          |                                     |     |                                                   |   |   |               |    |        |                |
|-----|----------------------------------------------------------|-------------------------------------|-----|---------------------------------------------------|---|---|---------------|----|--------|----------------|
|     |                                                          |                                     |     |                                                   |   |   |               |    |        | 10 (Kiss-/-)   |
| e-f | <i>KissCre<sup>-/-</sup> &amp; KissCre<sup>+/+</sup></i> | <i>Mixed C57Bl/6J &amp; 129/SvJ</i> | OVX | <i>AAV-flex-taCasp3-TEVp</i>                      | x | x | - / Kp10      | sc | Mating | 7 per genotype |
| I   | <i>KissCre<sup>-/-</sup> &amp; KissCre<sup>+/+</sup></i> | <i>Mixed C57Bl/6J &amp; 129/SvJ</i> | OVX | <i>AAV5-EF1a-DIO-hChR2(H134R)-mCherry-WPRE-pA</i> | x | - | Blue light*** |    | Mating | 8 per genotype |

**Fig. 3**

|   |           |                 |            |   |   |   |                |            |        |            |
|---|-----------|-----------------|------------|---|---|---|----------------|------------|--------|------------|
| a | <i>WT</i> | <i>C57Bl/6J</i> | OVX / VNOx | - | x | x | Saline / ZnSO4 | intranasal | Mating | 8/9/8/7    |
| b | <i>WT</i> | <i>C57Bl/6J</i> | OVX / VNOx | - | x | x | Saline / ZnSO4 | intranasal | Mating | 28/8/9/8/7 |

**Fig. 4**

|   |                                                                            |                 |     |   |   |   |             |    |                       |                                                                                   |
|---|----------------------------------------------------------------------------|-----------------|-----|---|---|---|-------------|----|-----------------------|-----------------------------------------------------------------------------------|
| a | <i>Dicer<sup>loxP/loxP</sup> &amp; GnRH::Cre;Dicer<sup>loxP/loxP</sup></i> | <i>C57Bl/6J</i> | OVX | - | x | x | Saline/Kp10 | sc | Male and female odors | 6 <i>Dicer<sup>loxP/loxP</sup></i> & 8 <i>GnRH::Cre;Dicer<sup>loxP/loxP</sup></i> |
| a | <i>Dicer<sup>loxP/loxP</sup> &amp; GnRH::Cre;Dicer<sup>loxP/loxP</sup></i> | <i>C57Bl/6J</i> | OVX | - | x | - | GnRH        | sc | Male and female odors | 6 <i>Dicer<sup>loxP/loxP</sup></i> & 8 <i>GnRH::Cre;Dicer<sup>loxP/loxP</sup></i> |



|          |                                                                                   |                 |     |   |   |   |          |    |        |                  |
|----------|-----------------------------------------------------------------------------------|-----------------|-----|---|---|---|----------|----|--------|------------------|
| <b>b</b> | <i>Dicer<sup>loxP/loxP</sup> &amp; GnRH::<i>Cre</i>;Dicer<sup>loxP/loxP</sup></i> | <i>C57Bl/6J</i> | OVX | - | x | x | -        |    | Mating | 7/8              |
| <b>c</b> | <i>Kiss<sup>+/+</sup> &amp; Kiss<sup>-/-</sup></i>                                | <i>129/SvJ</i>  | OVX | - | x | - | - / GnRH | sc | Mating | 10 per treatment |

**Fig. 5**

|            |                       |                                     |   |                                                    |   |   |   |   |   |                                          |
|------------|-----------------------|-------------------------------------|---|----------------------------------------------------|---|---|---|---|---|------------------------------------------|
| <b>a</b>   | <i>KissIC/R26-BIZ</i> | <i>Mixed C57Bl/6J &amp; 129/SvJ</i> | - | AAV5- <i>EF1a-DIO-hChR2(H134R)-mCherry-WPRE-pA</i> | - | - | - | - | - | 3 (unknown estrous cycle stage)          |
| <b>b-h</b> | <i>KissIC/R26-BIZ</i> | <i>Mixed C57Bl/6J &amp; 129/SvJ</i> | - | -                                                  | - | - | - | - | - | 6 (proestrus) and 8 (metestrus/diestrus) |

**Fig. 6**

|          |                                                    |                 |     |   |   |   |               |    |                       |                                                     |
|----------|----------------------------------------------------|-----------------|-----|---|---|---|---------------|----|-----------------------|-----------------------------------------------------|
| <b>a</b> | <i>nNOS<sup>+/+</sup> &amp; nNOS<sup>-/-</sup></i> | <i>C57Bl/6J</i> | OVX | - | x | x | Saline / SNAP | sc | Male and female odors | 6 (nNOS <sup>+/+</sup> ) / 7 (nNOS <sup>-/-</sup> ) |
| <b>b</b> | <i>nNOS<sup>+/+</sup> &amp; nNOS<sup>-/-</sup></i> | <i>C57Bl/6J</i> | OVX | - | x | x | Saline/ SNAP  | sc | Mating                | 7 per group                                         |
| <b>c</b> | <i>nNOS<sup>-/-</sup></i>                          | <i>C57Bl/6J</i> | OVX | - | x | x | - / Kp10      | sc | Mating                | 7 per group                                         |
| <b>c</b> | <i>nNOS<sup>-/-</sup></i>                          | <i>C57Bl/6J</i> | OVX | - | x | - | GnRH          | sc | Mating                | 7 per treatment                                     |

|                            |                                                          |                                     |     |                              |   |   |                 |     |        |                  |
|----------------------------|----------------------------------------------------------|-------------------------------------|-----|------------------------------|---|---|-----------------|-----|--------|------------------|
| <b>d</b>                   | <i>Kiss<sup>-/-</sup></i>                                | <i>129/SvJ</i>                      | OVX | -                            | x | x | - / SNAP        | sc  | Mating | 10 per treatment |
| <b>Supplementary Figs.</b> |                                                          |                                     |     |                              |   |   |                 |     |        |                  |
| <b>1</b>                   | <i>KissCre<sup>-/-</sup> &amp; KissCre<sup>+/+</sup></i> | <i>Mixed C57Bl/6J &amp; 129/SvJ</i> | OVX | <i>AAV-flex-taCasp3-TEVp</i> | x | - | -               | -   | -      | 7 per genotype   |
| <b>2-3</b>                 | <i>WT</i>                                                | <i>C57Bl/6J</i>                     | -   | -                            | - | - | -               | -   | Mating | 5 per group      |
| <b>4</b>                   | <i>WT</i>                                                | <i>C57Bl/6J</i>                     | OVX | -                            | x | x | Saline/<br>Kp10 | icv | Mating | 5/7              |
| <b>5</b>                   | <i>WT</i>                                                | <i>C57Bl/6J</i>                     | OVX | -                            | x | x | -               | sc  | Mating | 7/8/7/6          |

\*Viruses were injected bilaterally into the RP3V.

\*\* Progesterone was administered 3h prior to behavioral experiments.

\*\*\*Photostimulation at 10 Hz, 473 nm.

All experimental females were brought into behavioral estrus by adult ovariectomy and combined treatment with estradiol and progesterone unless stated otherwise. Furthermore, levels of female sexual behavior displayed by the control (wild-type) females vary as function of the background strain with *129/SvJ* females showing relatively low levels compared to *C57Bl/6J* females. Abbreviations: WT, wild-type; E2, estradiol; P, progesterone; sc, subcutaneous; icv, intracerebroventricular; Kp10, kisspeptin; SNAP, S-nitroso-N-acetylpenicillamine; RP3V, rostral periventricular area of the third ventricle of the hypothalamus.

Supplementary Table 2. Reagents and resources used in the present study.

| REAGENT or RESOURCE                                            | SOURCE                 | IDENTIFIER                     |
|----------------------------------------------------------------|------------------------|--------------------------------|
| Antibodies                                                     |                        |                                |
| Rabbit polyclonal anti-cFos                                    | Santa Cruz             | Cat# Sc-52R<br>AB_2106783      |
| Living Colors® rabbit polyclonal anti-ds-red                   | Clontech               | Cat# 9632496                   |
| Goat polyclonal anti-wheat germ agglutinin (WGA)               | Vector Laboratories    | Cat# AS-2024<br>AB_2315608     |
| Horse polyclonal biotinylated anti-goat                        | Vector Laboratories    | Cat# BA-9500<br>AB_2336123     |
| Cy3®-conjugated AffiniPure Fab Fragment donkey anti-rabbit IgG | Jackson ImmunoResearch | Cat# 711-167-003<br>AB_2340606 |
| Rabbit polyclonal anti-kisspeptin 10                           | Millipore              | Cat# AB9754<br>AB_2296529      |
| Goat polyclonal biotinylated anti-rabbit                       | Dako                   | Cat# B0432                     |
| Rabbit polyclonal anti-nNOS                                    | Life technologies      | Cat# 61-7000<br>AB_88207       |
|                                                                |                        |                                |

| Bacterial and Virus Strains                   |                                                        |         |
|-----------------------------------------------|--------------------------------------------------------|---------|
| AAV5-flex-taCasp3-TEVp                        | University of North Carolina Vector Core <sup>23</sup> | N/A     |
| AAV5-EF1a-DIO-hChR2(H134R)-mCherry-WPRE-pA    | University of North Carolina Vector Core <sup>62</sup> | N/A     |
| AAV9-EF1a-DIO-hChR2-(H134R)-mCherry-WPRE-hGH  | Penn Vector Core <sup>62</sup>                         | N/A     |
| Chemicals, Peptides, and Recombinant Proteins |                                                        |         |
| 17 $\beta$ -estradiol                         | Sigma                                                  | E8875   |
| Progesterone                                  | Sigma                                                  | P0130   |
| Mouse kisspeptin 10 (Kp-10)                   | NeoMPS, Strassbourg, France                            | N/A     |
| Gonadotropin-releasing hormone (GnRH)         | Polypeptide Laboratories France SAS                    | SC087   |
| S-nitroso-N-acetyl-DL-penicillamine (SNAP)    | Sigma                                                  | N398    |
| BAY41-2272                                    | Sigma                                                  | B8810   |
| Streptavidin-conjugated Cy5®                  | Invitrogen                                             | SA-1011 |
|                                               |                                                        |         |

| Critical Commercial Assays                               |                     |              |
|----------------------------------------------------------|---------------------|--------------|
| Tyramide Signal Amplification Plus (TSA+) biotin kit     | PerkinElmer         | NEL749A001KT |
| Avidin-biotin complex (ABC) kit                          | Vector Laboratories | PK-6100      |
|                                                          |                     |              |
| Experimental Models: Organisms/Strains                   |                     |              |
| Mouse: Kisspeptin knockout ( <i>Kiss<sup>-/-</sup></i> ) | 22                  | N/A          |
| Mouse: Kisspeptin-IRES-Cre ( <i>KissIC</i> )             | 26                  | N/A          |
| Mouse: GPR54-IRES-Cre ( <i>GPIC</i> )                    | 29                  | N/A          |
| Mouse: <i>GnRH::Cre</i>                                  | 12                  | N/A          |
| Mouse: <i>Dicer<sup>loxP/loxP</sup></i>                  | 59                  | N/A          |
| Mouse: <i>R26-BIZ</i>                                    | 31                  | N/A          |
| Mouse: nNOS knockout ( <i>nNOS<sup>-/-</sup></i> )       | 54, 60              | N/A          |
|                                                          |                     |              |
